# Supplementary material
Source: PubMed Central journal article supplement (PMC8195494)

# THE LANCET

## Supplementary appendix

This appendix formed part of the original submission and has been peer reviewed.  
We post it as supplied by the authors.

Supplement to: Guetl K, Gary T, Raggam RB, Schmid J, Wölfler A, Brodmann M.  
SARS-CoV-2 vaccine-induced immune thrombotic thrombocytopenia treated  
with immunoglobulin and argatroban. *Lancet* 2021; published online June 11.  
[http://dx.doi.org/10.1016/S0140-6736\(21\)01238-1](http://dx.doi.org/10.1016/S0140-6736(21)01238-1).

**Appendix**  
**Vaccine-induced immune thrombotic thrombocytopenia**

**Figure: Vaccine-induced immune thrombotic thrombocytopenia**

Small pelvic thrombi in contrast enhanced MRI (high resolution FLASH-3D). Thrombus (arrows) in a superficial muscle vein of the gluteus maximus muscle in an oblique paracoronal (A) and axial (B) reconstruction. Small thrombi (arrows) in a left presacral and lumbar vein (level L5/S1) in an oblique paracoronal (C) and left parasagittal (D) reconstruction.

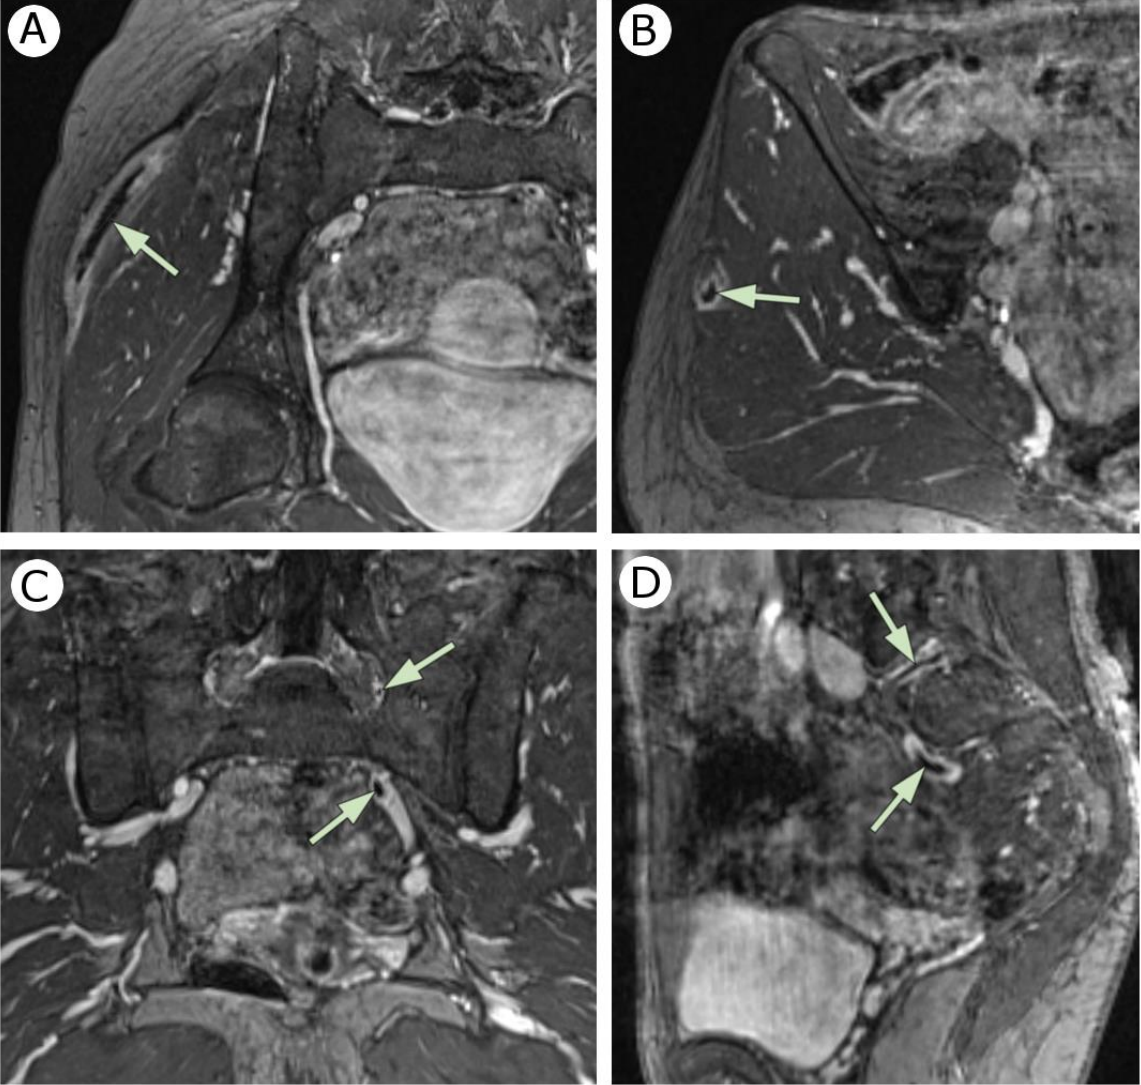

**Table: Vaccine-induced immune thrombotic thrombocytopenia**

Table shows blood results from day 1 to day 7 of the patient’s stay in hospital.

| Variable (unit)                 | d1    | d2    | d3    | d4    | d5  | d6    | d7    |
|---------------------------------|-------|-------|-------|-------|-----|-------|-------|
| Hb (g/dL)                       | 10.8  | 9.4   | 9.6   | 9.8   | 8.8 | 9.4   | 9.3   |
| Platelets (x10 <sup>9</sup> /L) | 27    | 32    | 67    | 123   | 112 | 170   | 228   |
| D-dimer (mg/L)                  | 33.00 | 33.00 | 32.10 | 14.71 | -   | 6.86  | 5.35  |
| Coagulation factor 13A (%)      | 63    | 41    | 49    | 42    | 47  | 60    | 56    |
| Fibrinogen (mg/dL)              | 121   | 64    | 85    | 129   | 125 | 149   | 160   |
| Thrombin Time (seconds)         | -     | 95.5  | 94.9  | 98.5  | -   | 137.1 | 127.5 |

**Figure: Vaccine-induced immune thrombotic thrombocytopenia**

Graph shows D-dimer and fibrinogen concentrations and platelet count during the patient's stay in hospital.

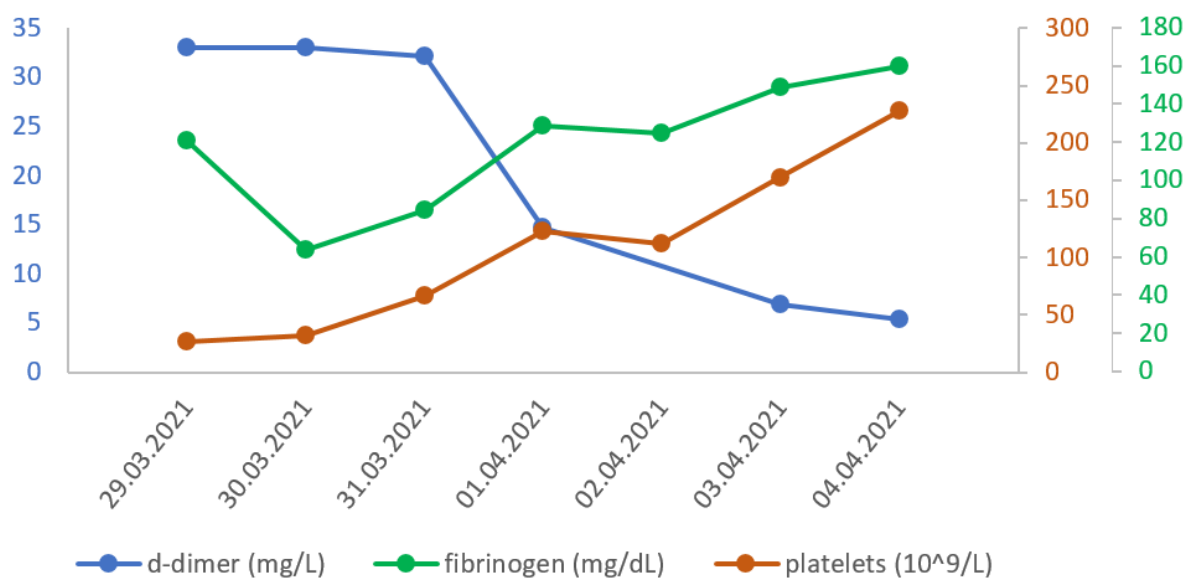

Supplement: mmc1.pdf [file mmc1.pdf]
